# Supplementary material for: Kompetensförsörjning i den nya HR-funktionen : en studie av HR-funktionens strukturella förändringar och dess betydelse för strategisk kompetensförsörjning
Source: Royal Society of Chemistry journal article supplement (doi:10.1039/d0ay01504k), 2005-01-01
Supplement: d0ay01504k1.pdf [file d0ay01504k1.pdf]

## **Supporting Information for**

# **Stimulated Raman Scattering by Intracavity Mixing of Nanosecond Laser Excitation and Fluorescence in Acoustically Levitated Droplets**

Andreas Bierstedt, Carsten Warschat, Yi You, Knut Rurack, and Jens Riedel\*

Bundesanstalt für Materialforschung und -prüfung (BAM), Richard-Willstätter-Straße 11,  
12489 Berlin, Germany

\*Corresponding author: Jens Riedel, E-mail: [Jens.Riedel@bam.de](mailto:Jens.Riedel@bam.de), Tel. +493081041003, Fax:  
+4930810471003

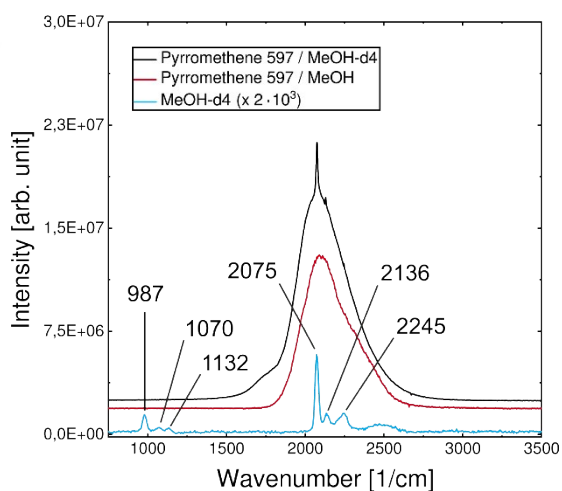

**Figure S1:** Recorded vibrational spectra of methanol-d4, pyrromethene 597 in methanol, and pyrromethene 597 in methanol-d4.

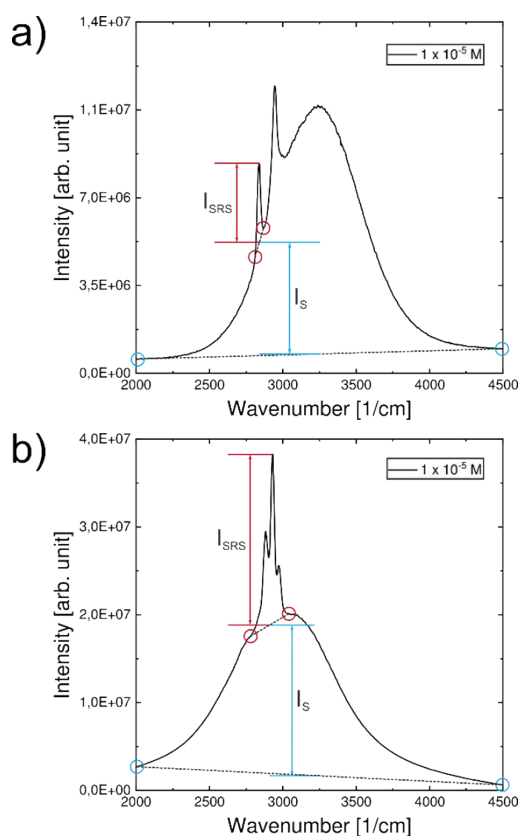

**Figure S2:** Procedure of data extraction and background correction.  $I_{\text{SRS}}$  was determined as the peak height of the spectral feature from the underlying background intensity derived from a linear fit between the visually determined onset points (circles). The same background intensity was used to determine  $I_{\text{S}}$ . For the background correction of the latter, again a linear fit of the baseline was performed.
